# Supplementary material
Source: publisher figshare collection journal article supplement (https://gsapubs.figshare.com/articles/dataset/_/14720742)
Supplement: Supplementary file 1 [file 1]

Liyun Zhang, Weiming Fan, Lin Ding, Alex Pullen, Mihai N. Ducea, Jinxiang Li, Chao Wang, Xiaoyan Xu, and Kyaing Sein, 2021, Forced subduction initiation within the Neotethys: An example from the mid-Cretaceous Wuntho-Popa arc in Myanmar: GSA Bulletin, <https://doi.org/10.1130/B35818.1>.

## Supplemental Material

**Table S1.** Published ages of ophiolites and arc magmatism in Myanmar and Andaman

**Table S2.** Zircon U-Pb geochronological data for the mid-Cretaceous Mawgyi Volcanics in the Wuntho-Popa arc of Myanmar

**Table S3.** Whole-rock major and trace element, and Sr-Nd isotopic compositions for mid-Cretaceous Mawgyi Volcanics in the Wuntho-Popa arc of Myanmar

**Table S4.** Published ages of Neotethyan ophiolites and associated metamorphic rocks from eastern Mediterranean, Middle East, Pakistan, Yarlung-Tsangpo suture and Southeast Asia
